# Supplementary material for: Nuclear RNase P of Trypanosoma brucei: A Single Protein in Place of the Multicomponent RNA-Protein Complex
Source: PubMed Central journal article supplement — Cell Rep. 2012 Jul 26;2(1):19–25. doi: 10.1016/j.celrep.2012.05.021 (PMC3807811; doi:10.1016/j.celrep.2012.05.021), 2012-07-26
Supplement: mmc1.pdf [file mmc1.pdf]

**Table S1. Oligonucleotide Primer Sets Used for Genotyping PCR, Related to Figure 4**

| <b>PCR</b>             | <b>forward primer</b>  | <b>reverse primer</b> |
|------------------------|------------------------|-----------------------|
| <i>RPR1</i> 5'         | CCTCGTGGCGCACATGGTA    | GGCGACAAGTCAAACGGA    |
| <i>RPR1</i> internal   | GGAAATTCGGTGG AACACA   | GGCGACAAGTCAAACGGA    |
| <i>RPR1</i> 3'         | GGAAATTCGGTGG AACACA   | ATCGGGTTCGCCACTAATG   |
| <i>rpr1Δ::kanMX</i> 5' | CCTCGTGGCGCACATGGTA    | GCGCACGTCAAGACTGTCAA  |
| <i>rpr1Δ::kanMX</i> 3' | GCGTCAATCGTATGTGAAT    | TTGGATATGGGCTGGAAC    |
| <i>PRORP1</i>          | GAAAGCGATGAGGTGAATTTGG | TCCCCGCCTAGAAGTTGT    |
| <i>NME1</i>            | CGTATGCGGAAAACGTAATGA  | GACCAAGAATAGTAAGCTCCA |
